# Supplementary material for: Metabolomic compounds identified in Piriformospora indica-colonized Chinese cabbage roots delineate symbiotic functions of the interaction
Source: PubMed Central journal article supplement (PMC5571224; doi:10.1038/s41598-017-08715-2), 2017-08-24
Supplement: 41598_2017_8715_MOESM1_ESM.pdf [file 41598_2017_8715_MOESM1_ESM.pdf]

Metabolomic compounds identified in *Piriformospora indica*-colonized Chinese cabbage roots delineate the symbiotic function of root endophytic fungus

Moda Sang Hua<sup>1</sup>, Rajendran Senthil Kumar<sup>1</sup>, Lie-Fen Shyur<sup>2</sup>, Yuan-Bin Cheng<sup>3</sup>, Zhihong Tian<sup>4</sup>, Ralf Oelmüller<sup>5\*\*</sup>, Kai-Wun Yeh<sup>1\*</sup>

### Supplementary Information

## Phenylalanine Metabolism

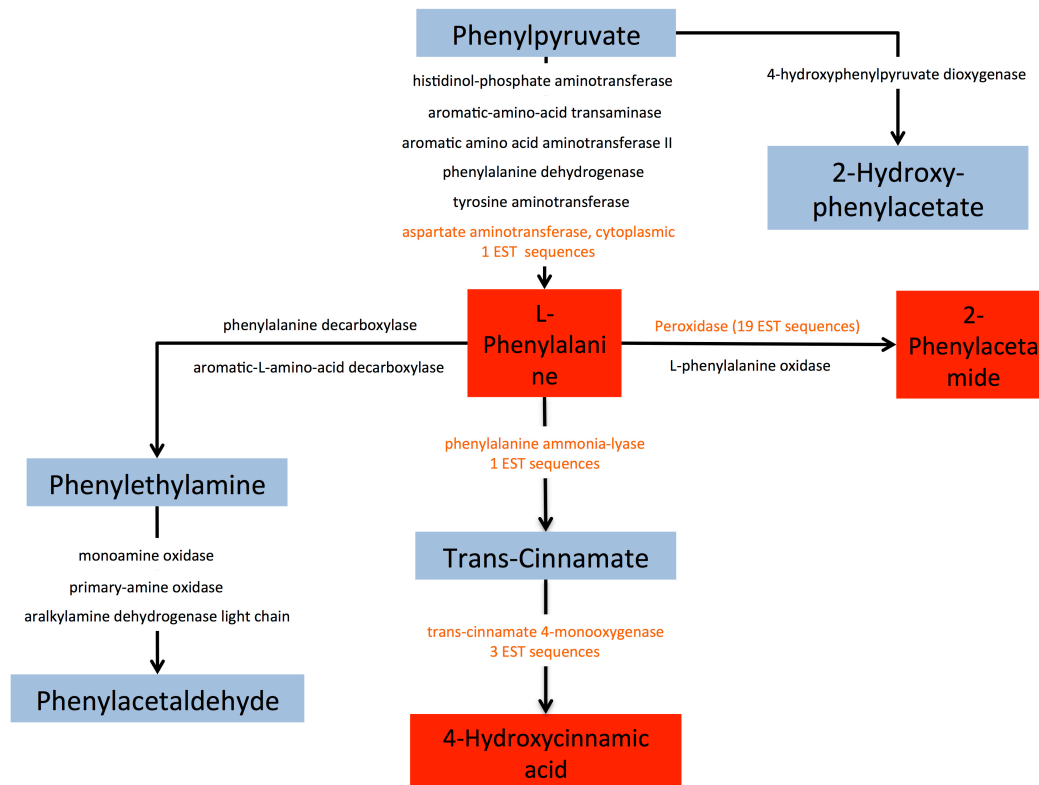

**Supplementary Fig S1. Phenylalanine metabolic pathway along with genes induced by *P. indica* after colonization.** Metabolites involve in Phenylalanine Metabolism such as L-phenylalanine, 2-phenylacetamide and 4-hydroxy cinnamic acid were shown to have increased after *P. indica* colonization. EST sequences mapped with subtractive EST analysis showed number of gene sequence found.

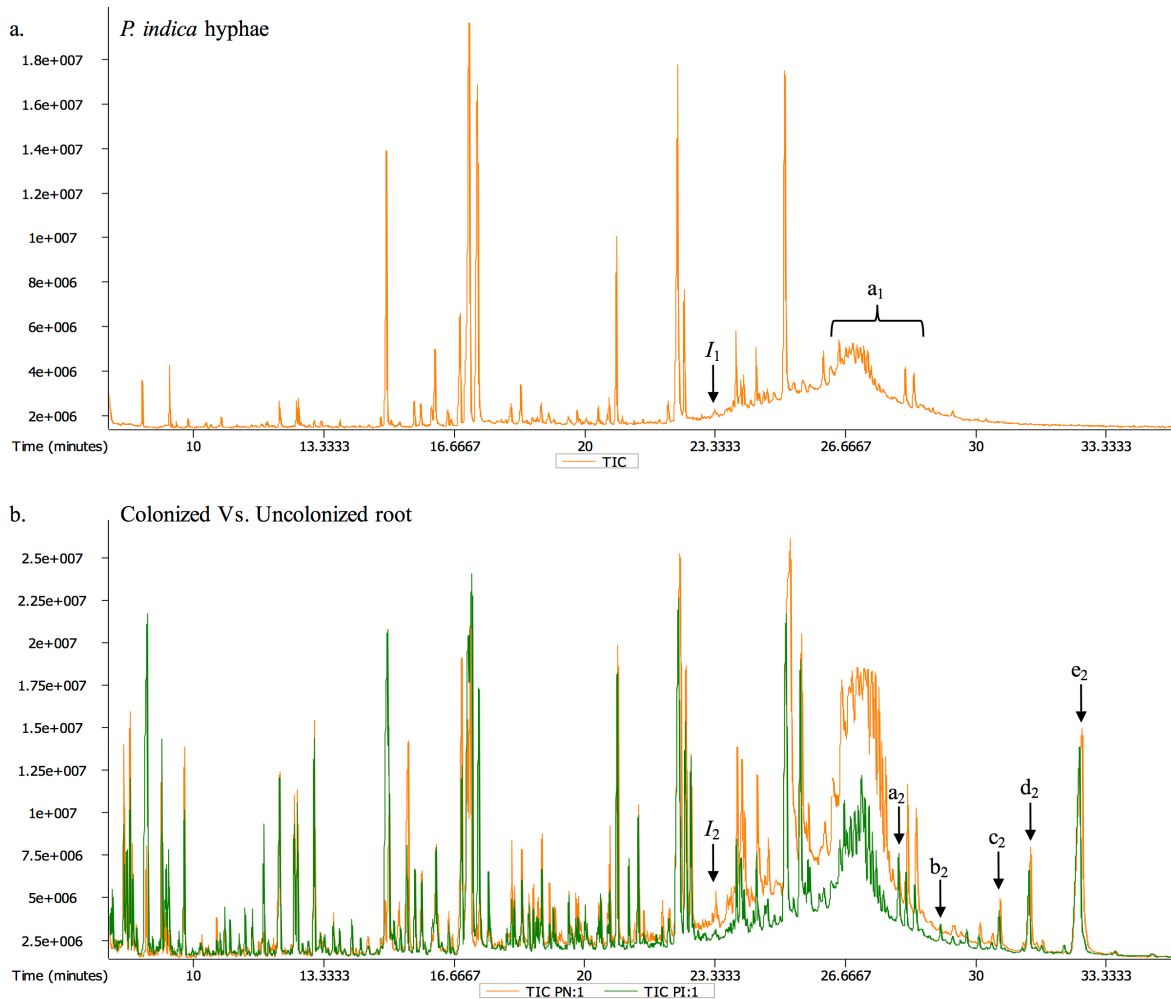

**Supplementary Fig S2. Unknown compounds, cholesterol and terpenoid derivatives along with the internal standard (nonadecanoic acid-trimethylsilyl ester), shown in a chromatogram. (a)** Chromatogram representing metabolites analyzed from 50µg/ml of sample prepared from *Hyphae* of *P. indica* where internal standard was loaded together ( $I_1$  - internal standard [100ng];  $a_1$  – unknown compounds). **(b)** Merged chromatogram showing metabolites analyzed from 50µg/ml sample prepared from *P. indica*-colonized (green label) and uncolonized (orange label) root where internal standard was loaded together ( $I_2$  - internal standard [100ng];  $a_2$  – terpenoid derivatives;  $b_2$  – tocopherol;  $c_2$  – cholesterol;  $d_2$  – campesterol;  $e_2$  – stigmasterol). Metabolites annotated were taken from five replicates having similar peaks. Within each replicate, these annotated metabolites (except internal standard) have very low ionic-ms-ms hit points to be identified from the library.

Supplementary Tables

**Supplementary Table 1. List of compounds identified by GC-MS specifically in: *Colonized root* and *Uncolonized root*.** List of identified compounds generated by MetPA online software from the three libraries: *Hyphae*, *Uncolonized root*, and *Colonized Root* obtained by GC-MS analysis. Only compounds with peak area over 700 and appeared in all the three biological repeats were listed and compounds shared among *Hyphae* and *Colonized root*; *Hyphae* and *Uncolonized root*; and *Hyphae*, *Colonized root* and *Uncolonized root* were not included. *Fisher's exact test* was used for matching the compounds.

| Compounds specific in colonized root            | Compounds specific in uncolonized root      |
|-------------------------------------------------|---------------------------------------------|
| Agmatine                                        | 1,2-Dihydronaphthalene-1,2-diol             |
| <b>(-)-Jasmonic acid*</b>                       | 1,2-Dihydroxy-8-carboxynaphthalene          |
| (13E)-11a-Hydroxy-9,15-dioxoprost-13-enoic acid | 2-Hydroxy-3-(4-hydroxyphenyl)propenoic acid |
| (S)-b-aminoisobutyric acid                      | 2-n-Propyl-4-pentenoic acid                 |
| 1-Aminocyclopropane-1-carboxylate               | 2-Pyrrolidinone                             |
| 1-Benzyl-1,2,3,4-tetrahydroisoquinoline         | 4-Hydroxybenzoic acid                       |
| 2-Phenylacetamide                               | 4-Isopropenyl-2-oxy-cyclohexanecarboxyl-CoA |
| 2-Phenylacetamide                               | 5-Amino-2-oxopentanoic acid                 |
| 2,3-Dihydroxy-3-methylbutanoate                 | Alpha-ketoisovaleric acid                   |
| 3-Hydroxybutyric acid                           | Aniline                                     |
| 3-Indoleacetonitrile                            | <b>Arachidonic acid*</b>                    |
| 3-O-Sulfogalactosylceramide (d18:1/18:1(9Z))    | Benzaldehyde                                |
| 4-Hydroxycinnamic acid                          | Caffeic acid                                |
| 8(R)-Hydroperoxylinoleic acid                   | Carnitine                                   |
| Adipic acid                                     | CE(10:0)                                    |
| Aminoacetone                                    | Diethanolamine                              |
| Arabinonic acid                                 | Dimethylallylpyrophosphate                  |
| Benzoic acid                                    | Formyl-5-hydroxykynurenamine                |
| CE(22:0)                                        | Geraniol                                    |
| Chloroacetic acid                               | Gluconic acid                               |
| cis-1,3-Dichloropropene                         | Glycine                                     |

|                         |                       |
|-------------------------|-----------------------|
| $\gamma$ -aminobutyrate | Itaconyl-CoA          |
| D-Galactose             | Mannitol              |
| D-Glucose               | Myristoleic acid      |
| D-Glucuronic acid       | Phenanthracene        |
| D-Ribose                | Propionic acid        |
| D-Xylose                | Propyl alcohol        |
| Diethylphosphate        | Protocatechuic acid   |
| Dodecanol               | Tetracosanoic acid    |
| Ethanol                 | Tetracosanoyl-CoA     |
| Formaldehyde            | Tetradecanedioic acid |
| Formamide               |                       |
| Glycerol                |                       |
| Hydrochloric acid       |                       |
| Icosenoic acid          |                       |
| Indole                  |                       |
| Indoleacetaldehyde      |                       |
| Indoleacetic acid       |                       |
| L-Phenylalanine         |                       |
| L-Valine                |                       |
| Maleic acid             |                       |
| Malic acid              |                       |
| Naphthalene             |                       |
| Octadecanol             |                       |
| p-Cymene                |                       |
| Palmitic acid           |                       |
| Phenylacetic acid       |                       |
| Phthalic acid           |                       |
| Prostaglandin A1        |                       |
| Palmitic acid           |                       |

|                   |  |
|-------------------|--|
| Pyruvaldehyde     |  |
| Pyruvic acid      |  |
| Salicin           |  |
| Terephthalic acid |  |
| Tiglic acid       |  |
| Traumatic acid    |  |
| Tridecanoic acid  |  |

**Supplementary Table 2. List of compounds identified by GC-MS common among/between: *Hyphae, Colonized and Uncolonized roots* (24); *Uncolonized and Colonized roots* (72); *Hyphae and Colonized roots* (16); *Hyphae and Uncolonized roots* (11). Only compounds with peak area over 700 and appeared in all the three biological repeats were listed and compounds found specifically in *Colonized root* or *Uncolonized root* were not included. Fisher's exact test was used for matching the compounds.**

| Compounds common in: Pi Hyphae, uncolonized and colonized root | Compounds specific in uncolonized and colonized root            | Compounds specific in Pi Hyphae and colonized root                         | Compounds specific in Pi Hyphae and uncolonized root                            |
|----------------------------------------------------------------|-----------------------------------------------------------------|----------------------------------------------------------------------------|---------------------------------------------------------------------------------|
| 1-Phenanthrenecarboxylic acid                                  | $\gamma$ -Linolenic acid*                                       | Terephthalic acid                                                          | 2-Furoic Acid                                                                   |
| 11-Amino[4.2.2]propellane-2,4,7-triene                         | hexahydronaphthalene                                            | 1-Decene, 4-methyl-                                                        | 4-Methyl-1,3-diaza-9,14-dioxaspiro[11.4]hexadecane-2,4-dien-8,10,13,15-tetraone |
| 2,6-di-butyl-2,5-cyclohexadiene-1,4-dione                      | 1,2,3,4-Tetrahydro-1,1,4,4,6-pentamethyl-5,7-dinitronaphthalene | 1-Hydroxy-1-phenylpent-3-en-2-one                                          | Cyclohexene, 4-(4-ethylcyclohexyl)-1-pentyl-                                    |
| 2-Ethylhexanoic acid                                           | propen-1-naphthalene                                            | 5-Eicosene, (E)-                                                           | CE(10:0)                                                                        |
| 3-Butyn-1-ol                                                   | 1-Iodo-2-methylundecane                                         | 9-Cyclohexylnonadecane                                                     | Diazene, dimethyl-                                                              |
| $\alpha$ -Linolenic acid                                       | 1-Isocyanatododecane                                            | Benzenepropanoic acid, 3,5-bis(1,1-dimethylethyl)-4-hydroxy-, methyl ester | Octanamide, N,N-dibutyl-                                                        |
| Acetic acid                                                    | 1-Oxa-spiro[4.5]deca-6,9-diene-2,8-dione, 7,9-di-tert-butyl-    | Benzoic acid                                                               | Phenyl N,N-dibutylcarbamate                                                     |

|                         |                                                                    |                                                   |                                         |
|-------------------------|--------------------------------------------------------------------|---------------------------------------------------|-----------------------------------------|
| Azelaic acid            | 1-oxy-6'-methoxy-1',2',3',4'-tetrahydronaphthalenyl)-2-buten-1-one | Ethanone, 1,1'-(1,4-phenylene)bis-                | Phthalic acid, bis(7-methyloctyl) ester |
| D-LACTIC ACID           | 10-Heneicosene (c,t)                                               | Adipic acid                                       | Propanoic acid                          |
| Dodecanoic acid         | L-Tryptophan                                                       | Methyl 1,3-dihydro-2H-isobenzofuran-4-carboxylate | Propan-2-ol                             |
| Dehydroabietic Acid     | 1H-Pyrrole-2,5-dione                                               | Phthalic acid, nonyl pentadecyl ester             | Hydrogen sulfite                        |
| Formamide, N,N-dibutyl- | Arabinofuranose                                                    | 3-Mercaptopyruvic acid                            |                                         |
| L-Octanoylcarnitine     | Tetramethyltricyclo[5.4.0.02,9]undecane                            | Dodecanedioic acid                                |                                         |
| Oxalic acid             | 2-(PHENYL)PROPYL                                                   | Heneicosane                                       |                                         |
| Oleic acid              | 2-Aminobenzoxazole                                                 | Hexadecanedioic acid                              |                                         |
| Pentadecane, 7-methyl-  | Propenoate                                                         | Myristic acid                                     |                                         |
| Pentadecanoic acid      | Pyroglutamic acid                                                  |                                                   |                                         |
| Sebacic acid            | 3,5-dimethoxy-benzaldehyde                                         |                                                   |                                         |
| Squalene                | Phytol                                                             |                                                   |                                         |
| Pelargonic acid         | 3-Ethyl-4-methyl-1H-pyrrole-2,5-dione                              |                                                   |                                         |
| Palmitoleic acid        | 7-METHYLHEPTADECANE                                                |                                                   |                                         |

|               |                                                   |  |  |
|---------------|---------------------------------------------------|--|--|
| LPA(16:0/0:0) | Acetamide, N,N-dibutyl-                           |  |  |
| Stearic acid  | Benzocaine                                        |  |  |
| Indoacetamide | Butyric acid                                      |  |  |
|               | Bis(2-methoxyethyl) Phthalate                     |  |  |
|               | Campesterol                                       |  |  |
|               | Cholesterol                                       |  |  |
|               | Cinnamic acid                                     |  |  |
|               | Cyclotetradecane                                  |  |  |
|               | DINONYL PHTHALATE                                 |  |  |
|               | Diisobutylphthalat                                |  |  |
|               | Diisononylphthalate                               |  |  |
|               | Arachidic acid                                    |  |  |
|               | Ferulate                                          |  |  |
|               | Caproic acid                                      |  |  |
|               | 2-Hydroxy-4-isopropenylcyclohexane-1-carboxyl-CoA |  |  |
|               | L-Proline                                         |  |  |
|               | 3-Dehydro-L-threonate                             |  |  |
|               | Linoleic acid                                     |  |  |
|               | Mesityl oxide                                     |  |  |
|               | Monoethyl malonic acid                            |  |  |
|               | N-OCTOXYETHANOL ETHER                             |  |  |



|  |                                                               |  |  |
|--|---------------------------------------------------------------|--|--|
|  | Nicotinic acid                                                |  |  |
|  | OXYCARBONYL-2-PHENYL ETHENE                                   |  |  |
|  | Suberic acid                                                  |  |  |
|  | Oxacyclotetradeca-4,11-diyne                                  |  |  |
|  | Valeric acid                                                  |  |  |
|  | Phenyl dibutylcarbamate                                       |  |  |
|  | Sinapate                                                      |  |  |
|  | Sucrose                                                       |  |  |
|  | L-Serine                                                      |  |  |
|  | Stigmasterol                                                  |  |  |
|  | Tert-Butyl isocyanide                                         |  |  |
|  | Tri-m-cresyl phosphate                                        |  |  |
|  | Undecylcyclohexane                                            |  |  |
|  | [1,1'-Bicyclopropyl]-2-octanoic acid, 2'-hexyl-, methyl ester |  |  |
|  | Erucic acid                                                   |  |  |
|  | isophthalate                                                  |  |  |
|  | methyl palmitate                                              |  |  |
|  | n-Octyl acetate                                               |  |  |
|  | Sphinganine                                                   |  |  |
|  | sphinganine, 2-methyl-                                        |  |  |
|  | trans-sinapinic acid                                          |  |  |

|  |                                     |  |  |
|--|-------------------------------------|--|--|
|  | $\alpha$ -Tocopherol<br>(vitamin E) |  |  |
|  | $\beta$ -Sitosterol                 |  |  |
|  | 2-Decenal                           |  |  |
|  | Chalcone                            |  |  |
|  | Succinic acid                       |  |  |
|  | Diethyl Phthalate                   |  |  |
|  | L-threonine                         |  |  |
|  | Phenylpropanolamine                 |  |  |
|  | Urea                                |  |  |
